# Supplementary material for: Molecular dynamics study of fluorosulfonyl ionic liquids as electrolyte for electrical double layer capacitors
Source: Royal Society of Chemistry journal article supplement (doi:10.1039/d3ra04798a), 2023-01-01
Supplement: d3ra04798a1.pdf [file d3ra04798a1.pdf]

Supporting Information

**Molecular Dynamics Study of Fluorosulfonyl Ionic Liquids as  
Electrolyte for Electrical Double Layer Capacitors**

Siqi Wang, Zhuo Li, Guangmin Yang\*, and Jianyan Lin\*

College of Physics, Changchun Normal University, Changchun 130032, China

\*E-mail: yangguangmin@mail.ccsfu.edu.cn

\*E-mail: linjy994@nenu.edu.cn

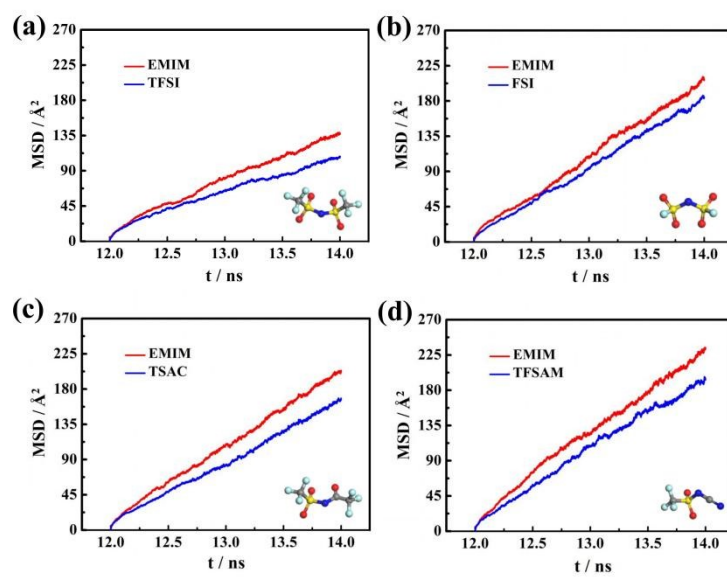

**Figure S1.** Mean Square Displacement (MSD) curves of the four fluorinated sulfonyl ILs using OPLS-VSIL force field.

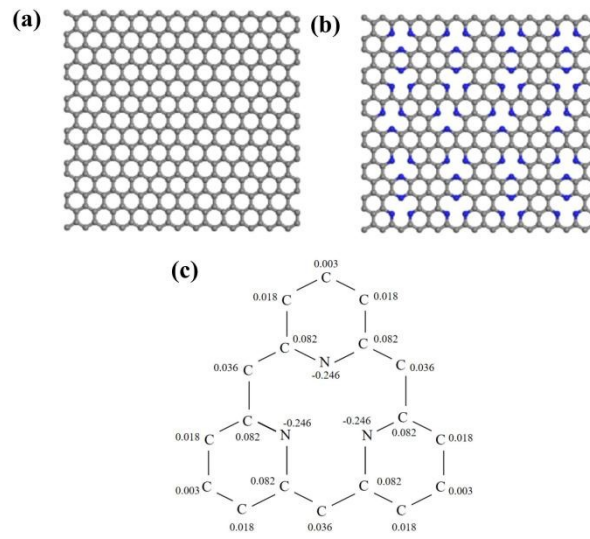

**Figure S2.** (a) Pristine graphene electrode; (b) defect graphene electrode; (c) Local charge distribution of defective graphene electrode

**Table S1.** Self diffusion parameters of four fluorinated sulfonyl ionic liquids

|           | $D^+(10^{-10}\text{m}^2/\text{s})$ | $D^-(10^{-10}\text{m}^2/\text{s})$ |
|-----------|------------------------------------|------------------------------------|
| EMIMTFSI  | 0.332                              | 0.211                              |
| EMIMFSI   | 0.552                              | 0.394                              |
| EMIMTSAC  | 0.34                               | 0.219                              |
| EMIMTFSAM | 0.511                              | 0.299                              |

**Table S2.** Values of Beta Factors

|           |       | OPLS | OPLS-VSIL |
|-----------|-------|------|-----------|
| EMIMTFSI  | EMIM  | 0.6  | 0.8       |
|           | TFSI  | 0.7  | 0.7       |
| EMIMFSI   | EMIM  | 0.6  | 0.9       |
|           | FSI   | 0.7  | 0.9       |
| EMIMFSAC  | EMIM  | 0.8  | 1         |
|           | TSAC  | 0.6  | 1         |
| EMIMTFSAM | EMIM  | 0.8  | 0.9       |
|           | TFSAM | 0.6  | 0.8       |

**Table S3.** Comparison of self diffusion coefficients simulated by OPLS and OPLS-VSIL force field

|           | OPLS                                                 |                                                      | OPLS-VSIL                                            |                                                      |
|-----------|------------------------------------------------------|------------------------------------------------------|------------------------------------------------------|------------------------------------------------------|
|           | D <sup>+</sup> (10 <sup>-10</sup> m <sup>2</sup> /s) | D <sup>-</sup> (10 <sup>-10</sup> m <sup>2</sup> /s) | D <sup>+</sup> (10 <sup>-10</sup> m <sup>2</sup> /s) | D <sup>-</sup> (10 <sup>-10</sup> m <sup>2</sup> /s) |
| EMIMTFSI  | 0.332                                                | 0.211                                                | 1.041                                                | 0.785                                                |
| EMIMFSI   | 0.552                                                | 0.394                                                | 1.642                                                | 1.481                                                |
| EMIMTSAC  | 0.34                                                 | 0.219                                                | 1.6                                                  | 1.3                                                  |
| EMIMTFSAM | 0.511                                                | 0.299                                                | 1.728                                                | 1.542                                                |

**Table S4.** Comparison of Conductivity simulated by OPLS and OPLS-VSIL force field

|           | OPLS                       | OPLS-VSIL                  |
|-----------|----------------------------|----------------------------|
| EMIMTFSI  | 6.69 S • cm <sup>-1</sup>  | 21.45 S • cm <sup>-1</sup> |
| EMIMFSI   | 14 S • cm <sup>-1</sup>    | 46.14 S • cm <sup>-1</sup> |
| EMIMTSAC  | 7.12 S • cm <sup>-1</sup>  | 36.46 S • cm <sup>-1</sup> |
| EMIMTFSAM | 12.23 S • cm <sup>-1</sup> | 45.92 S • cm <sup>-1</sup> |
